# Supplementary material for: Psychometric properties of self-reported financial toxicity measures in cancer survivors: a systematic review
Source: HighWire-hosted journal article supplement (doi:10.1136/bmjopen-2021-057215), 2022-06-01
Supplement: bmjopen-2021-057215supp002_data_supplement.pdf [file bmjopen-2021-057215supp002_data_supplement.pdf]

**Appendix II COSMIN Checklists****eTable 1** COSMIN risk of bias checklist

| PROM Development                                                                                                                                                      | Results |
|-----------------------------------------------------------------------------------------------------------------------------------------------------------------------|---------|
| 1. Is a clear description provided of the construct to be measured?                                                                                                   |         |
| 2. Is the origin of the construct clear: was a theory, conceptual framework or disease model used or clear rationale provided to define the construct to be measured? |         |
| 3. Is a clear description provided of the target population for which the PROM was developed?                                                                         |         |
| 4. Is a clear description provided of the context of use                                                                                                              |         |
| 5. Was the PROM development study performed in a sample representing the target population for which the PROM was developed?                                          |         |
| 6. Was an appropriate qualitative data collection method used to identify relevant items for a new PROM?                                                              |         |
| 7. Were skilled group moderators/interviewers used?                                                                                                                   |         |
| 8. Were the group meetings or interviews based on an appropriate topic or interview guide?                                                                            |         |
| 9. Were the group meetings or interviews recorded and transcribed verbatim?                                                                                           |         |
| 10. Was an appropriate approach used to analyse the data?                                                                                                             |         |
| 11. Was at least part of the data coded independently?                                                                                                                |         |
| 12. Was data collection continued until saturation was reached?                                                                                                       |         |
| 13. For quantitative studies (surveys): was the sample size appropriate?                                                                                              |         |
| 14. Was a cognitive interview study or other pilot test conducted?                                                                                                    |         |
| 15. Was the cognitive interview study or other pilot test performed in a sample representing the target population?                                                   |         |
| 16. Were patients asked about the comprehensibility of the PROM?                                                                                                      |         |
| 17. Were all items tested in their final form?                                                                                                                        |         |
| 18. Was an appropriate qualitative method used to assess the comprehensibility of the PROM instructions, items, response options, and recall period?                  |         |
| 19. Was each item tested in an appropriate number of patients?                                                                                                        |         |
| 20. Were skilled interviewers used?                                                                                                                                   |         |
| 21. Were the interviews based on an appropriate interview guide?                                                                                                      |         |
| 22. Were the interviews recorded and transcribed verbatim?                                                                                                            |         |
| 23. Was an appropriate approach used to analyse the data?                                                                                                             |         |
| 24. Were at least two researchers involved in the analysis?                                                                                                           |         |
| 25. Were problems regarding the comprehensibility of the PROM instructions, items, response options, and recall period appropriately addressed by adapting the PROM?  |         |
| 26. Were patients asked about the comprehensiveness of the PROM?                                                                                                      |         |
| 27. Was the final set of items tested?                                                                                                                                |         |
| 28. Was an appropriate method used for assessing the comprehensiveness of the PROM?                                                                                   |         |
| 29. Was each item tested in an appropriate number of patients?                                                                                                        |         |
| 30. Were skilled interviewers used?                                                                                                                                   |         |
| 31. Were the interviews based on an appropriate interview guide?                                                                                                      |         |
| 32. Were the interviews recorded and transcribed verbatim?                                                                                                            |         |

|                                                                                                                                                          |  |
|----------------------------------------------------------------------------------------------------------------------------------------------------------|--|
| 33. Was an appropriate approach used to analyse the data?                                                                                                |  |
| 34. Were at least two researchers involved in the analysis?                                                                                              |  |
| 35. Were problems regarding the comprehensiveness of the PROM appropriately addressed by adapting the PROM?                                              |  |
| Content validity                                                                                                                                         |  |
| 1. Was an appropriate method used to ask patients whether each item is relevant for their experience with the condition?                                 |  |
| 2. Was each item tested in an appropriate number of patients?                                                                                            |  |
| 3. Were skilled group moderators/interviewers used?                                                                                                      |  |
| 4. Were the group meetings or interviews based on an appropriate topic or interview guide?                                                               |  |
| 5. Were the group meetings or interviews recorded and transcribed verbatim?                                                                              |  |
| 6. Was an appropriate approach used to analyse the data?                                                                                                 |  |
| 7. Were at least two researchers involved in the analysis?                                                                                               |  |
| 8. Was an appropriate method used for assessing the comprehensiveness of the PROM?                                                                       |  |
| 9. Was each item tested in an appropriate number of patients?                                                                                            |  |
| 10. Were skilled group moderators/interviewers used?                                                                                                     |  |
| 11. Were the group meetings or interviews based on an appropriate topic or interview guide?                                                              |  |
| 12. Were the group meetings or interviews recorded and transcribed verbatim?                                                                             |  |
| 13. Was an appropriate approach used to analyse the data?                                                                                                |  |
| 14. Were at least two researchers involved in the analysis?                                                                                              |  |
| 15. Was an appropriate qualitative method used for assessing the comprehensibility of the PROM instructions, items, response options, and recall period? |  |
| 16. Was each item tested in an appropriate number of patients?                                                                                           |  |
| 17. Were skilled group moderators/interviewers used?                                                                                                     |  |
| 18. Were the group meetings or interviews based on an appropriate topic or interview guide?                                                              |  |
| 19. Were the group meetings or interviews recorded and transcribed verbatim?                                                                             |  |
| 20. Was an appropriate approach used to analyse the data?                                                                                                |  |
| 21. Were at least two researchers involved in the analysis?                                                                                              |  |
| 22. Was an appropriate method used to ask professionals whether each item is relevant for the construct of interest?                                     |  |
| 23. Were professionals from all relevant disciplines included?                                                                                           |  |
| 24. Was each item tested in an appropriate number of professionals?                                                                                      |  |
| 25. Was an appropriate approach used to analyse the data?                                                                                                |  |
| 26. Were at least two researchers involved in the analysis?                                                                                              |  |
| 27. Was an appropriate method used for assessing the comprehensiveness of the PROM?                                                                      |  |
| 28. Were professionals from all relevant disciplines included?                                                                                           |  |
| 29. Was each item tested in an appropriate number of professionals?                                                                                      |  |
| 30. Was an appropriate approach used to analyse the data?                                                                                                |  |
| 31. Were at least two researchers involved in the analysis?                                                                                              |  |
| Structural validity                                                                                                                                      |  |

|                                                                                                                                                                                           |  |
|-------------------------------------------------------------------------------------------------------------------------------------------------------------------------------------------|--|
| 1. For CTT: Was exploratory or confirmatory factor analysis performed?                                                                                                                    |  |
| 2. For IRT/Rasch: does the chosen model fit to the research question?                                                                                                                     |  |
| 3. Was the sample size included in the analysis adequate?                                                                                                                                 |  |
| 4. Were there any other important flaws in the design or statistical methods of the study?                                                                                                |  |
| Internal consistency                                                                                                                                                                      |  |
| 1. Was an internal consistency statistic calculated for each unidimensional scale or subscale separately?                                                                                 |  |
| 2. For continuous scores: Was Cronbach's alpha or omega calculated?                                                                                                                       |  |
| 3. For dichotomous scores: Was Cronbach's alpha or KR-20 calculated?                                                                                                                      |  |
| 4. For IRT-based scores: Was standard error of the theta (SE ( $\theta$ )) or reliability coefficient of estimated latent trait value (index of (subject or item) separation) calculated? |  |
| 5. Were there any other important flaws in the design or statistical methods of the study?                                                                                                |  |
| Cross-cultural validity                                                                                                                                                                   |  |
| 1. Were the samples similar for relevant characteristics except for the group variable?                                                                                                   |  |
| 2. Was an appropriate approach used to analyse the data?                                                                                                                                  |  |
| 3. Was the sample size included in the analysis adequate?                                                                                                                                 |  |
| 4. Were there any other important flaws in the design or statistical methods of the study?                                                                                                |  |
| Reliability                                                                                                                                                                               |  |
| 1. Were patients stable in the interim period on the construct to be measured?                                                                                                            |  |
| 2. Was the time interval appropriate?                                                                                                                                                     |  |
| 3. Were the test conditions similar for the measurements? e.g. type of administration, environment, instructions                                                                          |  |
| 4. For continuous scores: Was an intraclass correlation coefficient (ICC) calculated?                                                                                                     |  |
| 5. For dichotomous/nominal/ordinal scores: Was kappa calculated?                                                                                                                          |  |
| 6. For ordinal scores: Was a weighted kappa calculated?                                                                                                                                   |  |
| 7. For ordinal scores: Was the weighting scheme described? e.g. linear, quadratic                                                                                                         |  |
| 8. Were there any other important flaws in the design or statistical methods of the study?                                                                                                |  |
| Measurement error                                                                                                                                                                         |  |
| 1. Were patients stable in the interim period on the construct to be measured?                                                                                                            |  |
| 2. Was the time interval appropriate?                                                                                                                                                     |  |
| 3. Were the test conditions similar for the measurements? (e.g. type of administration, environment, instructions)                                                                        |  |
| 4. For continuous scores: Was the Standard Error of Measurement (SEM), Smallest Detectable Change (SDC) or Limits of Agreement (LoA) calculated?                                          |  |
| 5. For dichotomous/nominal/ordinal scores: Was the percentage (positive and negative) agreement calculated?                                                                               |  |
| 6. Were there any other important flaws in the design or statistical methods of the study?                                                                                                |  |
| Criterion validity                                                                                                                                                                        |  |
| 1. For continuous scores: Were correlations, or the area under the receiver operating curve calculated?                                                                                   |  |
| 2. For dichotomous scores: Were sensitivity and specificity determined?                                                                                                                   |  |
| 3. Were there any other important flaws in the design or statistical methods of the study?                                                                                                |  |
| Hypotheses testing for construct validity                                                                                                                                                 |  |

|                                                                                                                                          |  |
|------------------------------------------------------------------------------------------------------------------------------------------|--|
| 1. Is it clear what the comparator instrument(s) measure(s)?                                                                             |  |
| 2. Were the measurement properties of the comparator instrument(s) sufficient?                                                           |  |
| 3. Was the statistical method appropriate for the hypotheses to be tested?                                                               |  |
| 4. Were there any other important flaws in the design or statistical methods of the study?                                               |  |
| 5. Was an adequate description provided of important characteristics of the subgroups?                                                   |  |
| 6. Was the statistical method appropriate for the hypotheses to be tested?                                                               |  |
| 7. Were there any other important flaws in the design or statistical methods of the study?                                               |  |
| Responsiveness                                                                                                                           |  |
| 1. For continuous scores: Were correlations between change scores, or the area under the Receiver Operator Curve (ROC) curve calculated? |  |
| 2. For dichotomous scales: Were sensitivity and specificity (changed versus not changed) determined?                                     |  |
| 3. Were there any other important flaws in the design or statistical methods of the study?                                               |  |
| 4. Is it clear what the comparator instrument(s) measure(s)?                                                                             |  |
| 5. Were the measurement properties of the comparator instrument(s) sufficient?                                                           |  |
| 6. Was the statistical method appropriate for the hypotheses to be tested?                                                               |  |
| 7. Were there any other important flaws in the design or statistical methods of the study?                                               |  |
| 8. Was an adequate description provided of important characteristics of the subgroups?                                                   |  |
| 9. Was the statistical method appropriate for the hypotheses to be tested?                                                               |  |
| 10. Were there any other important flaws in the design or statistical methods of the study?                                              |  |
| 11. Was an adequate description provided of the intervention given?                                                                      |  |
| 12. Was the statistical method appropriate for the hypotheses to be tested?                                                              |  |
| 13. Were there any other important flaws in the design or statistical methods of the study?                                              |  |

**eTable 2** Criteria for good measurement properties

| Measurement property                      | Rating | Criteria                                                                                                                                                                                                                                                                                                                                                                                                                                                                                                                                                                                                                                                               |
|-------------------------------------------|--------|------------------------------------------------------------------------------------------------------------------------------------------------------------------------------------------------------------------------------------------------------------------------------------------------------------------------------------------------------------------------------------------------------------------------------------------------------------------------------------------------------------------------------------------------------------------------------------------------------------------------------------------------------------------------|
| Structural validity                       | +      | <b>CTT:</b><br>CFA: CFI or TLI or comparable measure $>0.95$ OR RMSEA $<0.06$ OR SRMR $<0.082$<br><br><b>IRT/Rasch:</b><br>No violation of unidimensionality <sup>3</sup> : CFI or TLI or comparable measure $>0.95$ OR RMSEA $<0.06$ OR SRMR $<0.08$<br>AND<br>no violation of local independence: residual correlations among the items after controlling for the dominant factor $<0.20$ OR Q3's $<0.37$<br>AND<br>no violation of monotonicity: adequate looking graphs OR item scalability $>0.30$<br>AND<br>adequate model fit:<br>IRT: $\chi^2 >0.01$<br>Rasch: infit and outfit mean squares $\geq 0.5$ and $\leq 1.5$ OR Z standardized values $>-2$ and $<2$ |
|                                           | ?      | CTT: Not all information for '+' reported<br>IRT/Rasch: Model fit not reported                                                                                                                                                                                                                                                                                                                                                                                                                                                                                                                                                                                         |
|                                           | -      | Criteria for '+' not met                                                                                                                                                                                                                                                                                                                                                                                                                                                                                                                                                                                                                                               |
| Internal consistency                      | +      | At least low evidence for sufficient structural validity AND Cronbach's alpha(s) $\geq 0.70$ for each unidimensional scale or subscale                                                                                                                                                                                                                                                                                                                                                                                                                                                                                                                                 |
|                                           | ?      | Criteria for "At least low evidence <sup>4</sup> for sufficient structural validity" not met                                                                                                                                                                                                                                                                                                                                                                                                                                                                                                                                                                           |
|                                           | -      | At least low evidence for sufficient structural validity AND Cronbach's alpha(s) $<0.70$ for each unidimensional scale or subscale                                                                                                                                                                                                                                                                                                                                                                                                                                                                                                                                     |
| Reliability                               | +      | ICC or weighted Kappa $\geq 0.70$                                                                                                                                                                                                                                                                                                                                                                                                                                                                                                                                                                                                                                      |
|                                           | ?      | ICC or weighted Kappa not reported                                                                                                                                                                                                                                                                                                                                                                                                                                                                                                                                                                                                                                     |
|                                           | -      | ICC or weighted Kappa $<0.70$                                                                                                                                                                                                                                                                                                                                                                                                                                                                                                                                                                                                                                          |
| Measurement error                         | +      | SDC or LoA $< \text{MIC}$                                                                                                                                                                                                                                                                                                                                                                                                                                                                                                                                                                                                                                              |
|                                           | ?      | MIC not defined                                                                                                                                                                                                                                                                                                                                                                                                                                                                                                                                                                                                                                                        |
|                                           | -      | SDC or LoA $> \text{MIC}$                                                                                                                                                                                                                                                                                                                                                                                                                                                                                                                                                                                                                                              |
| Hypotheses testing for construct validity | +      | The result is in accordance with the hypothesis                                                                                                                                                                                                                                                                                                                                                                                                                                                                                                                                                                                                                        |
|                                           | ?      | No hypothesis defined (by the review team)                                                                                                                                                                                                                                                                                                                                                                                                                                                                                                                                                                                                                             |
|                                           | -      | The result is not in accordance with the hypothesis                                                                                                                                                                                                                                                                                                                                                                                                                                                                                                                                                                                                                    |
| Cross-cultural                            | +      | No important differences found between group factors (such                                                                                                                                                                                                                                                                                                                                                                                                                                                                                                                                                                                                             |

|                                 |   |                                                                                                                              |
|---------------------------------|---|------------------------------------------------------------------------------------------------------------------------------|
| validity\measurement invariance |   | as age, gender, language) in multiple group factor analysis OR no important DIF for group factors (McFadden's $R^2 < 0.02$ ) |
|                                 | ? | No multiple group factor analysis OR DIF analysis performed                                                                  |
|                                 | - | Important differences between group factors OR DIF was found                                                                 |
| Criterion validity              | + | Correlation with gold standard $\geq 0.70$ OR $AUC \geq 0.70$                                                                |
|                                 | ? | Not all information for '+' reported                                                                                         |
|                                 | - | Correlation with gold standard $< 0.70$ OR $AUC < 0.70$                                                                      |
| Responsiveness                  | + | The result is in accordance with the hypothesis <sup>7</sup> OR $AUC \geq 0.70$                                              |
|                                 | ? | No hypothesis defined (by the review team)                                                                                   |
|                                 | - | The result is not in accordance with the hypothesis <sup>7</sup> OR $AUC < 0.70$                                             |

AUC: area under the curve; CFA: confirmatory factor analysis; CFI: comparative fit index; CTT: classical test theory; DIF: differential item functioning; ICC: intraclass correlation coefficient; IRT: item response theory; LoA: limits of agreement; MIC: minimal important change; RMSEA: Root Mean Square Error of Approximation; SEM: Standard Error of Measurement; SDC: smallest detectable change; SRMR: Standardized Root Mean Residuals; TLI: Tucker-Lewis index; "+": sufficient; "-": insufficient; "?": indeterminate.

**eTable 3** Modified GRADE approach for assessing certainty of evidence \*

| Domain        | Grade                       | Reason                                                                                                        |
|---------------|-----------------------------|---------------------------------------------------------------------------------------------------------------|
| Risk of bias  | -0 level: No                | There are multiple studies of at least adequate quality, or there is one study of very good quality available |
|               | -1 level: Serious           | There are multiple studies of doubtful quality available, or there is only one study of adequate quality      |
|               | -2 level: Very serious      | There are multiple studies of inadequate quality, or there is only one study of doubtful quality available    |
|               | -3 level: Extremely serious | There is only one study of inadequate quality available                                                       |
| Inconsistency | -0 level: No                | There is no inconsistency among pooled studies or there is only one study in subgroups                        |
|               | -1 level: Serious           | There are severe inconsistencies among pooled studies                                                         |
|               | -2 level: Very serious      | There are very severe inconsistencies among pooled studies.                                                   |
| Imprecision   | -0 level: No                | Total sample size >50-100                                                                                     |
|               | -1 level: Serious           | Total sample size =50-100                                                                                     |
|               | -2 level: Very serious      | Total sample size <50                                                                                         |
| Indirectness  | -0 level: No                | There is no indirectness between results and conclusion                                                       |
|               | -1 level: Serious           | There is severe indirectness between results and conclusion                                                   |
|               | -2 level: Very serious      | There is very severe indirectness between results and conclusion                                              |

\*The starting point of quality level is high evidence. The quality of evidence is subsequently downgraded to moderate, low, or very low evidence.
